# Supplementary material for: A phosphine-based fluorescent probe for fluorescent imaging of hypochlorous acid in living cells and zebrafish
Source: Royal Society of Chemistry journal article supplement (doi:10.1039/d3nj01491f), 2023-01-01
Supplement: d3nj01491f1.pdf [file d3nj01491f1.pdf]

## Supporting Information

A Phosphine-based fluorescent probe for fluorescent imaging of  
hypochlorous acid in living cells and zebrafish

Sheng Bi,<sup>1,†</sup> Taorui Yang,<sup>1,†</sup> Ke An,<sup>1</sup> Shidong Wang,<sup>1,2</sup> and Yifeng Han<sup>1,\*</sup>

<sup>1</sup> *Department of Chemistry, Zhejiang Sci-Tech University, Hangzhou 310018, China.*

<sup>2</sup> *Wayen Biotechnologies (Shanghai), Inc, Shanghai, China.*

\*Corresponding author, E-mail: [zstuchem@gmail.com](mailto:zstuchem@gmail.com) (Y. Han); Tel: +86-751-86843550;

## Contents

|                                                           |     |
|-----------------------------------------------------------|-----|
| Experimental section.....                                 | S3  |
| Additional spectroscopic data.....                        | S5  |
| Comparison of fluorescent probes for HOCl detection ..... | S11 |
| The characterization data of <b>BBP</b> .....             | S16 |
| References.....                                           | S18 |

## Experimental section

Reagents, materials, and apparatus:

All the solvents used in the experiment were of analytic grade. The reaction progress was monitored by thin-layer chromatography (TLC) on silica gel plates (GF<sub>254</sub>) visualized by UV light. 200-300 mesh silica gel was used for column chromatography. NMR experiments were carried out on a Bruker AV-400 NMR spectrometer with chemical shifts reported in ppm (in CDCl<sub>3</sub>, DMSO-*d*<sub>6</sub>, or TMS as an internal standard). Mass spectra were measured on an Agilent 1290 LC-MS spectrometer. All pH measurements were made with a Sartorius basic pH-Meter PB-10. Fluorescence spectra were determined on a PerkinElmer LS55 Fluorescence spectrophotometer. Absorption spectra were collected on a Shimadzu UV 2501(PC)S UV-Visible spectrophotometer. The excitation and emission widths for **BBP** were all 1.5.

Preparation of various ROS and RNS species:<sup>[1]</sup>

HOCl: Take an appropriate amount of commercially available hypochlorous acid solution and prepare about 10<sup>-2</sup> M hypochlorous acid stock solution with deionized water. Dilute the hypochlorous acid solution, and calibrate its concentration ( $\epsilon = 350 \text{ M}^{-1}\text{cm}^{-1}$ ) through the ultraviolet spectrum absorption value at 292 nm.

ONOO<sup>-</sup>: To a vigorously stirred solution of NaNO<sub>2</sub> (0.6 M, 10 mL) and H<sub>2</sub>O<sub>2</sub> (0.7 M, 10 mL) in deionized H<sub>2</sub>O at 0 °C was added HCl (0.6 M, 10 mL), immediately followed by the rapid addition of NaOH (1.5 M, 20 mL). Excess hydrogen peroxide was removed by passing the solution through a short column of MnO<sub>2</sub>. The concentration of ONOO<sup>-</sup> was determined by UV analysis with the extinction coefficient at 302 nm ( $\epsilon = 1670 \text{ M}^{-1} \text{ cm}^{-1}$ ). The solution were stored at -20 °C for use.

NO: A solution of the  $\text{H}_2\text{SO}_4$  (3.6 M) was added dropwise into a stirred solution of  $\text{NaNO}_2$  (7.3 M). The emitted gas was allowed to pass through a solution of  $\text{NaOH}$  (2 M) first and then deionized  $\text{H}_2\text{O}$  to make a saturated NO solution of 2.0 mM.

$^1\text{O}_2$ :  $\text{NaMoO}_4$  (10 mM) and  $\text{H}_2\text{O}_2$  (10 mM) was prepared in PBS (10 mM, pH 7.4). Equal aliquots of these solutions were then mixed to yield  $^1\text{O}_2$  of 5 mM.

$\text{H}_2\text{O}_2$ : Take an appropriate amount of commercially available  $\text{H}_2\text{O}_2$  solution and prepare about  $10^{-2}$  M  $\text{H}_2\text{O}_2$  stock solution with deionized water. And its concentration is calibrated by the ultraviolet absorption value at 240 nm ( $\epsilon = 43.6\text{M}^{-1}\text{cm}^{-1}$ ).

$\cdot\text{OH}$ :  $\cdot\text{OH}$  was generated by Fenton reaction. To a solution of  $\text{H}_2\text{O}_2$  (1.0 mM, 1.0 mL) in PBS (10 mM, pH 7.4) was added  $\text{FeSO}_4$  solution (1.0 mM, 100  $\mu\text{L}$ ) at ambient temperature (stock solution 0.1 mM).

$\text{ROO}\cdot$ :  $\text{ROO}\cdot$  was generated from 2, 2'-azobis(2-amidinopropane)dihydrochloride, which was dissolved in PBS (10 mM, pH 7.4) 1 h before use to make a stock solution of 10 mM.

## Additional spectroscopic data

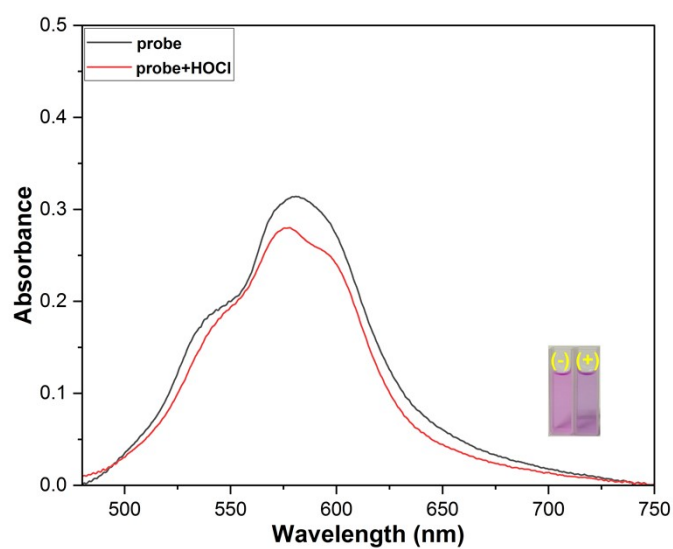

**Fig. S1** The UV-vis spectrum of **BBP** (10.0  $\mu\text{M}$ ) with and without of HOCl (2.0 equiv.) in PBS buffer solution (10 mM, pH 7.2, containing 10% EtOH). Bottom inset: Cuvette images of the probe **BBP** before and after adding HOCl.

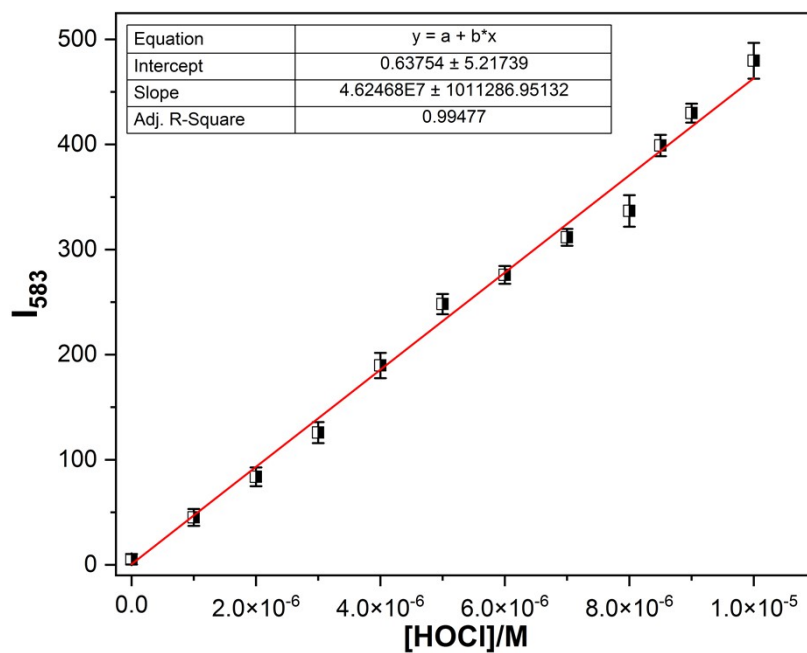

**Fig. S2** The fluorescent intensity of **BBP** (10.0  $\mu\text{M}$ ) at 583 nm ( $I_{583}$ ) as a function of HOCl concentration (0-10.0  $\mu\text{M}$ ) in PBS buffer solution (10 mM, pH 7.2, containing 10% EtOH,  $\lambda_{\text{ex}} = 552$  nm).

The detection limit (DL) of HOCl using **BBP** was determined from the following equation: <sup>[2]</sup>

$$DL = 3 \cdot \sigma / K$$

Where  $\sigma$  is the standard deviation of the blank solution; K is the slope of the calibration curve.

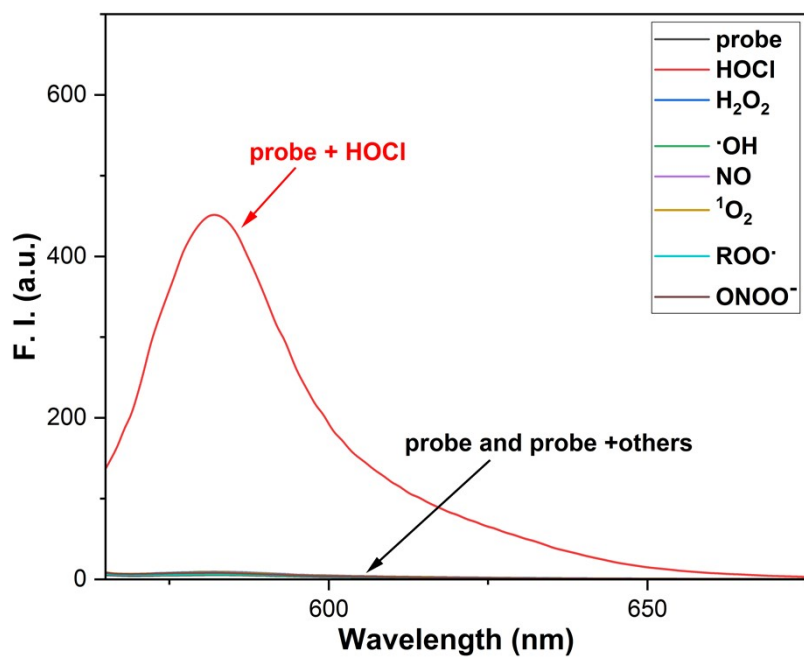

**Fig. S3** The fluorescent spectra of **BBP** (10  $\mu\text{M}$ ) before and after the addition of various analytes (100  $\mu\text{M}$  each, including  $^1\text{O}_2$ ,  $\text{H}_2\text{O}_2$ ,  $\text{NO}$ ,  $\cdot\text{OH}$ ,  $\text{ROO}\cdot$ , and  $\text{ONOO}^-$ ), and  $\text{HOCl}$  (10  $\mu\text{M}$ ), ( in PBS buffer solution, 10 mM, pH 7.2, containing 10% EtOH,  $\lambda_{\text{ex}} = 552$  nm).

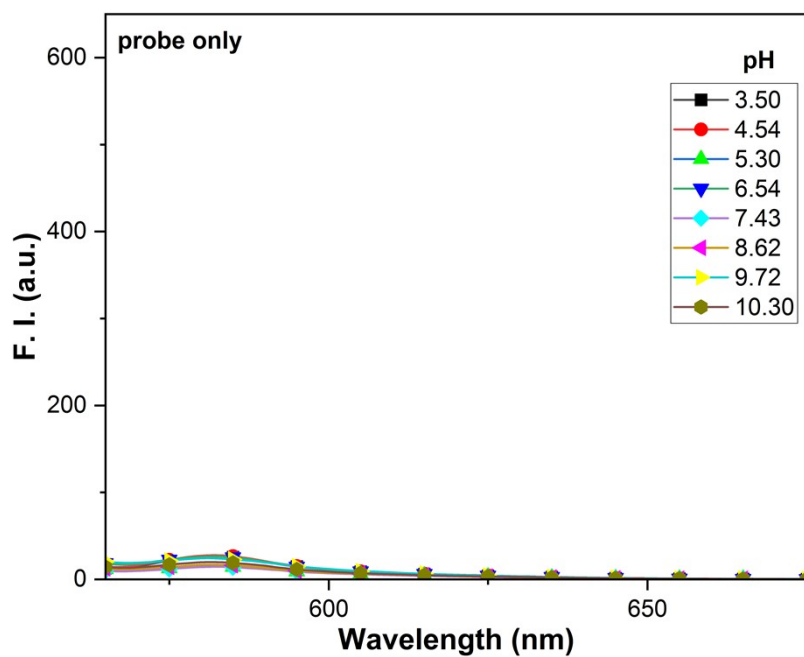

**Fig. S4.** The fluorescence spectra of the probe **BBP** (10 μM) alone at different pH values ( $\lambda_{\text{ex}} = 552$  nm).



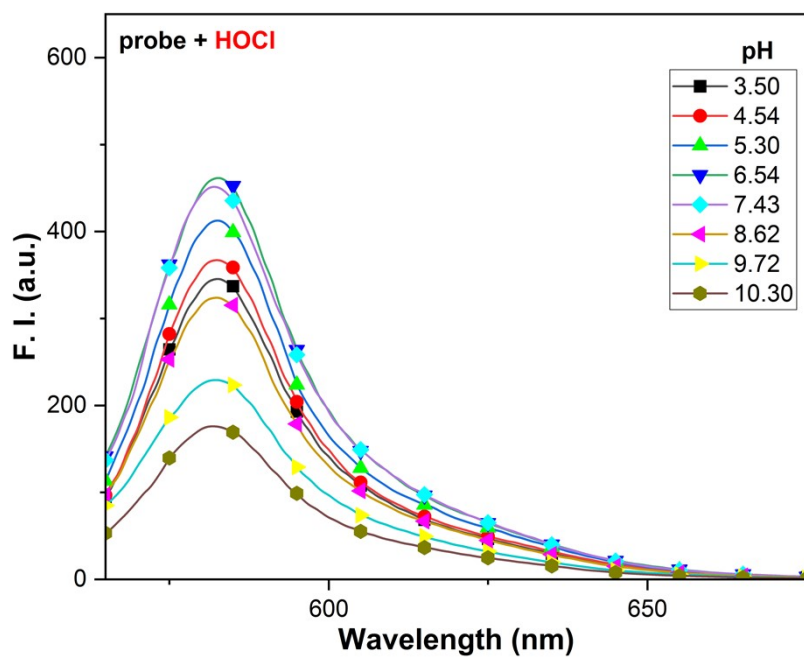

**Fig. S5.** The fluorescence spectra of the probe **BBP** (10  $\mu\text{M}$ ) in the present of HOCl (10  $\mu\text{M}$ ) at different pH values ( $\lambda_{\text{ex}} = 552 \text{ nm}$ ).

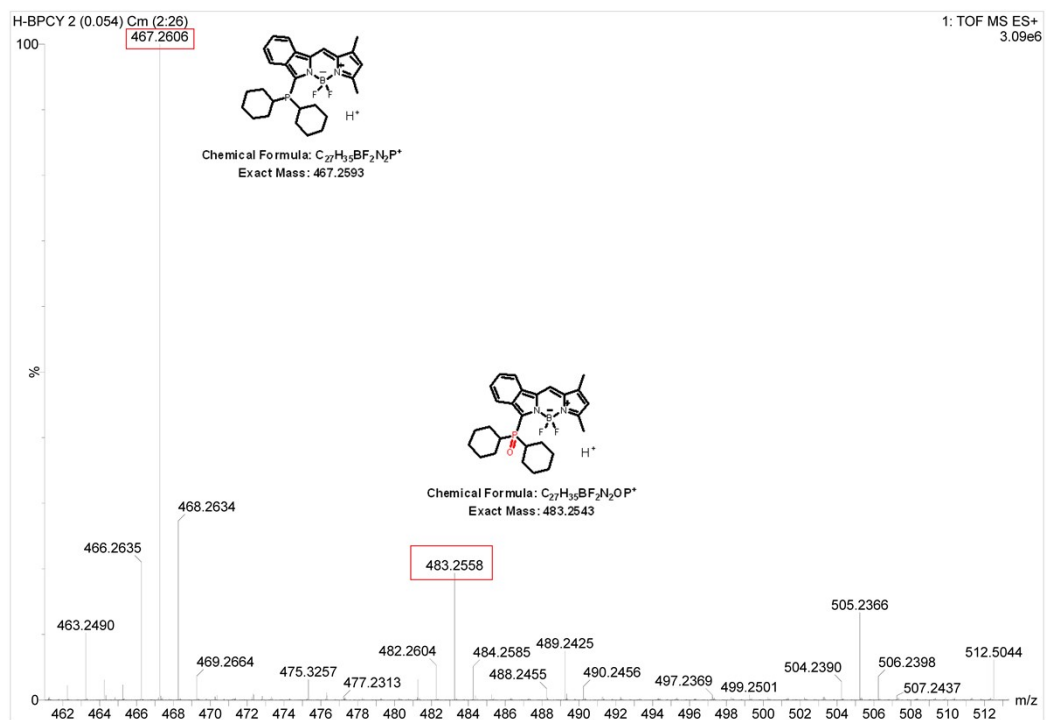

**Fig. S6.** The HR ESI-MS spectrum of **BBP** and HOCl mixture.

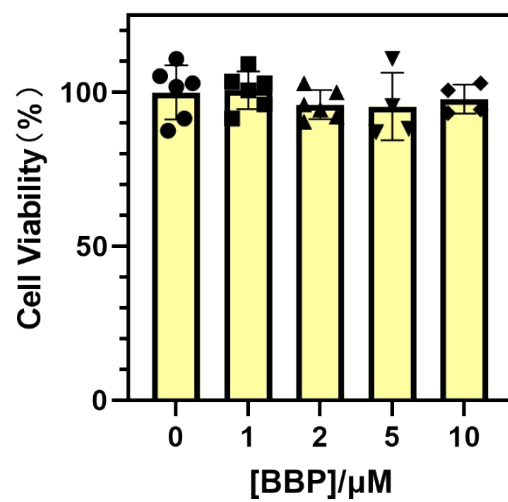

**Fig. S7.** Cell viability of the probe in a standard MTT assay in living RAW 264.7 cells for 24 h. The experiment was repeated three times.

**Table S1.** Comparison of fluorescent probes for HOCl detection.

| No. | Structures                                                                          | Abs/Em  | Stocks Shift | LOD     | Cell Imaging | Mouse/Zebra Fish Imaging | Refs |
|-----|-------------------------------------------------------------------------------------|---------|--------------|---------|--------------|--------------------------|------|
| 1   | 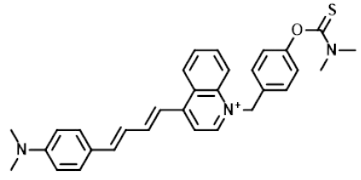   | 387/590 | 203          | 2.4 nM  | √            | ×                        | [3]  |
| 2   |    | 694/712 | 18           | 89.7 nM | √            | √                        | [4]  |
| 3   |    | 430/620 | 190          | 30.8 nM | √            | ×                        | [5]  |
| 4   |   | 567/623 | 56           | 5.8 μM  | √            | √                        | [6]  |
| 5   |  | 350/492 | 142          | 250 nM  | √            | ×                        | [7]  |
| 6   |  | 513/556 | 43           | 785 nM  | √            | ×                        | [8]  |
| 7   |  | 468/553 | 85           | 17 nM   | √            | ×                        | [9]  |
| 8   |  | 692/738 | 46           | 90 nM   | √            | ×                        | [10] |

|    |                                                                                     |         |     |         |   |   |      |
|----|-------------------------------------------------------------------------------------|---------|-----|---------|---|---|------|
| 9  | 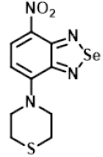   | 520/620 | 100 | -       | × | × | [11] |
| 10 |    | 622/655 | 33  | 30 nM   | √ | √ | [12] |
| 11 |    | 438/503 | 65  | 25.8 nM | √ | × | [13] |
| 12 |   | 374/595 | 221 | 118 nM  | √ | √ | [14] |
| 13 |  | 596/638 | 42  | 94.7 nM | √ | × | [15] |
| 14 |  | 435/456 | 21  | 0.14 μM | √ | × | [16] |
| 15 |  | 328/394 | 66  | -       | √ | × | [17] |
| 16 |  | 364/530 | 166 | 32 μM   | √ | × | [18] |
| 17 |  | 700/-   | -   | 0.36 μM | √ | × | [19] |



|    |                                                                                   |         |     |              |   |   |           |
|----|-----------------------------------------------------------------------------------|---------|-----|--------------|---|---|-----------|
| 27 | 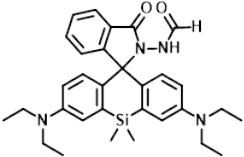 | 653/669 | 16  | 0.23 $\mu$ M | √ | × | [29]      |
| 28 |  | 425/653 | 228 | 15.3 nM      | √ | × | [30]      |
| 29 |  | 504/642 | 142 | 16.1 nM      | √ | √ | [31]      |
| 30 |  | 575/583 | 8   | 15.3 nM      | √ | √ | This work |

## The characterization data of BBP

### $^1\text{H}$ NMR of **3** (BBP)

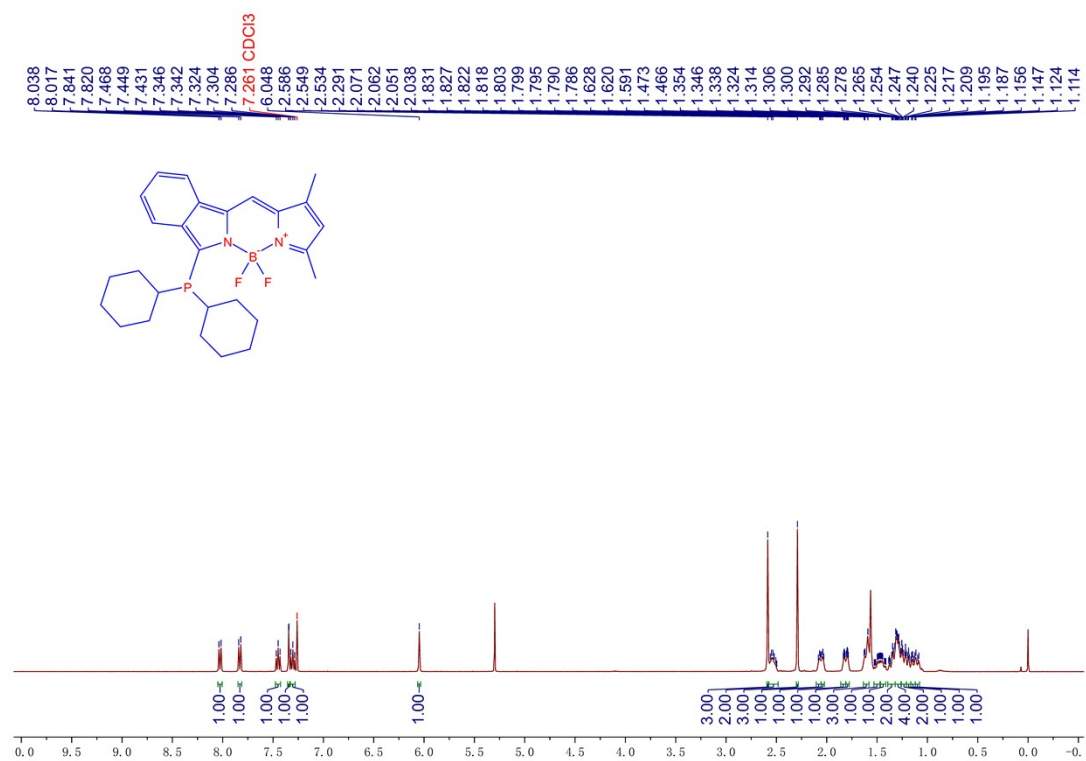

### $^{13}\text{C}$ NMR of **3** (BBP)

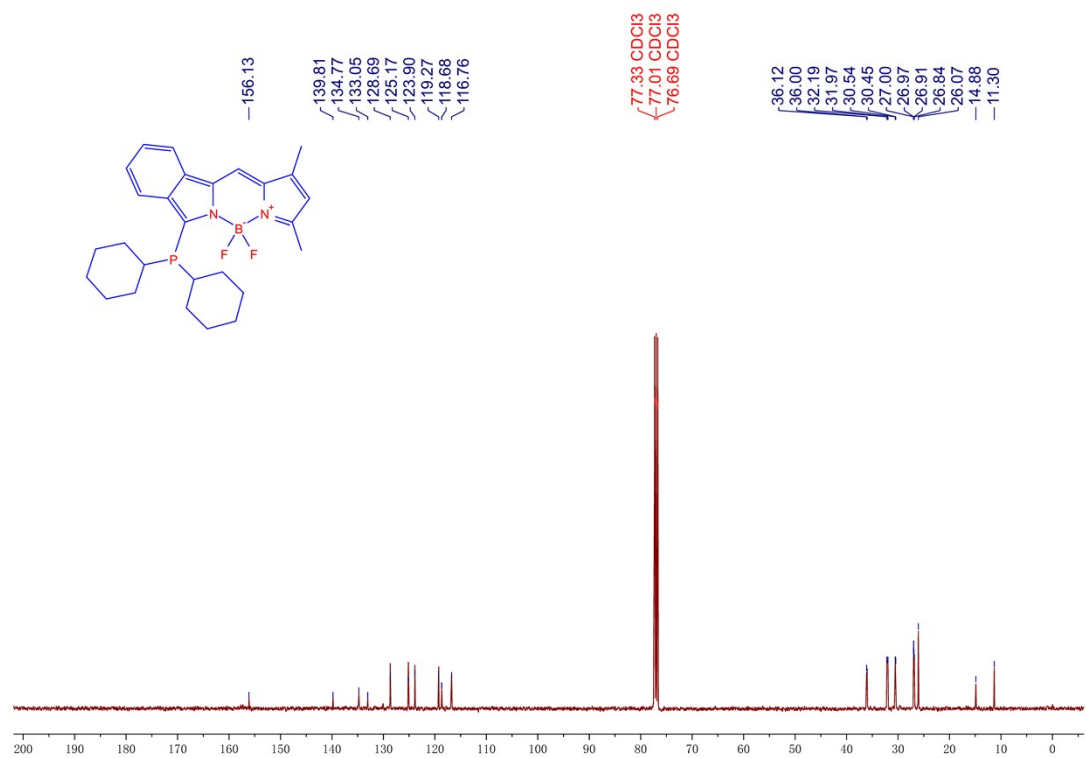



### $^{31}\text{P}$ NMR of **3** (BBP)

$^{31}\text{P}$  NMR (162 MHz, Chloroform-*d*)  $\delta$  -8.10 (t,  $J = 66.6$  Hz).

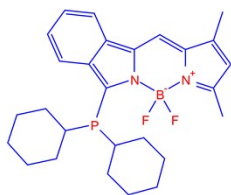

$\delta$  -7.687  
 $\delta$  -8.102  
 $\delta$  -8.510

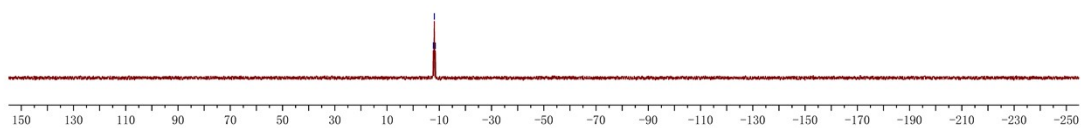

### HR-MS of **3** (BBP)

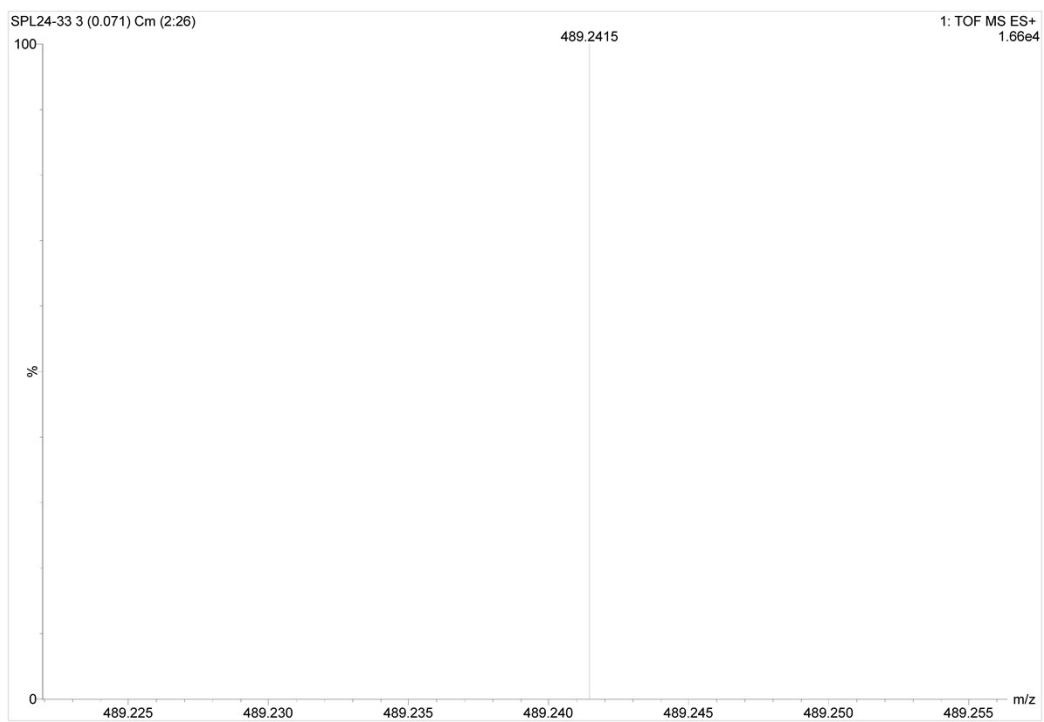

## References

- [1] T. Peng, N. K. Wong, X. Chen, Y. K. Chan, D. H. Ho, Z. Sun, J. J. Hu, J. Shen, H. El-Nezami, D. Yang, *J. Am. Chem. Soc.*, 2014, **136**, 11728.
- [2] (a) J. T. Yeh, P. Venkatesan and S. P. Wu, *New J. Chem.*, 2014, **38**, 6198-6204. (b) A. Roy, D. Kand, T. Saha and P. Talukdar, *Chem. Commun.*, 2014, **50**, 5510.
- [3] S. Mu, L. Jiang, H. Gao, J. Zhang, H. Sun, X. Shi, X. Liu, H. Zhang, *Anal. Chim. Acta*, 2022, **1191**, 339287.
- [4] H. Fang, Y. Chen, S. Geng, S. Yao, Z. Guo, W. He, *Anal. Chem.*, 2022, **94**, 17904.
- [5] M. Wang, X. Han, X. Yang, J. Liu, X. Song, W. Zhu, Y. Ye, *Analyst*, 2021, **146**, 6490.
- [6] Q. Pang, T. Li, C. Yin, K. Ma, F. Huo, *Analyst*, 2021, **146**, 3361.
- [7] D. Pan, Y. Don, Y. Lu, G. Xiao, H. Chi, Z. Hu, *Anal. Chim. Acta*, 2022, **1235**, 340559.
- [8] W. Zhang, W. Song, W. Lin, *J. Mater. Chem. B*, 2021, **9**, 7381.
- [9] K. Wang, Y. Liu, C. Liu, H. Zhu, X. Li, M. Yu, L. Liu, G. Sang, W. Sheng, B. Zhu, *Sci. Total Environ.*, 2022, **839**, 156164.
- [10] W.J. Shi, L.X. Feng, X. Wang, Y. Huang, Y.F. Wei, Y.Y. Huang, H.J. Ma, W. Wang, M. Xiang, L. Gao, *Talanta*, 2021, **233**, 122581.
- [11] M. Swierczynska, D. Slowinski, R. Michalski, J. Romanski, R. Podsiadly, *Spectrochim. Acta A Mol. Biomol. Spectrosc.*, 2023, **289**, 122193.
- [12] G.J. Mao, Y.Y. Wang, W.P. Dong, H.M. Meng, Q.Q. Wang, X.F. Luo, Y. Li, G. Zhang, *Spectrochim. Acta A Mol. Biomol. Spectrosc.*, 2021, **249**, 119326.
- [13] J. Chen, Y. Lu, Y. Wu, Z. Chen, X. Liu, C. Zhang, J. Sheng, L. Li, W. Chen, X. Song, *ACS Chem. Neurosci.*, 2021, **12**, 4058.

- [14] Z. Zhan, L. Chai, Q. Lei, X. Zhou, Y. Wang, H. Deng, Y. Lv, W. Li, *Anal. Chim. Acta*, 2021, **1187**, 339159.
- [15] A. Zheng, H. Liu, C. Peng, X. Gao, K. Xu, B. Tang, *Talanta*, 2021, **226**, 122152.
- [16] B. Gu, M. Liu, J. Long, X. Ye, Z. Xu, Y. Shen, *Spectrochim. Acta A Mol. Biomol. Spectrosc.*, 2022, **278**, 121290.
- [17] A. Grzelakowska, M. Zielonka, K. Debowska, J. Modrzejewska, M. Szala, A. Sikora, J. Zielonka, R. Podsiadly, *Free Radic. Biol. Med.*, 2021, **169**, 24.
- [18] C. Xu, Y. Zhou, Z. Li, Y. Zhou, X. Liu, X. Peng, *J. Hazard. Mater.*, 2021, **418**, 126243.
- [19] W.J. Shi, Q.H. Wan, F. Yang, X. Wang, Y.F. Wei, X.R. Lin, J.Y. Zhang, R.H. Deng, J.Y. Chen, L. Zheng, F. Liu, L. Gao, *Spectrochim. Acta A Mol. Biomol. Spectrosc.*, 2022, **279**, 121490.
- [20] S. Cheng, A. Li, X. Pan, H. Wang, C. Zhang, J. Li, X. Qi, *Anal. Bioanal. Chem.*, 2021, **413**, 4441.
- [21] F.F. Guo, W.N. Wu, X.L. Zhao, Y. Wang, Y.C. Fan, C.X. Zhang, Z.H. Xu, *Spectrochim. Acta A Mol. Biomol. Spectrosc.*, 2022, **264**, 120270.
- [22] W. Qu, B. Yang, T. Guo, R. Tian, S. Qiu, X. Chen, Z. Geng, Z. Wang, *Analyst*, 2022, **148**, 38.
- [23] M. He, H. Sun, J. Wei, R. Zhang, X. Han, Z. Ni, *Spectrochim. Acta A Mol. Biomol. Spectrosc.*, 2021, **247**, 119138.
- [24] S. Zhang, L. Ning, Z. Song, X. Zhao, F. Guan, X.F. Yang, J. Zhang, *Anal. Chem.*, 2022, **94**, 5805.
- [25] G.S. Malankar, A. Sakunthala, A. Navalkar, S.K. Maji, S. Raju, S.T. Manjare, *Anal. Chim. Acta*, 2021, **1150**, 338205.
- [26] Y. Gan, G. Yin, X. Zhang, L. Zhou, Y. Zhang, H. Li, P. Yin, *Talanta*, 2021, **225**, 122030.

- [27] W. Cheng, X. Xue, L. Gan, P. Jin, B. Zhang, M. Guo, J. Si, H. Du, H. Chen, J. Fang, *Anal. Chim. Acta*, 2021, **1156**, 338362.
- [28] X. Jia, C. Wei, Z. Li, L. Liu, M. Wang, P. Zhang, X. Li, *Chem. Asian J.*, 2021, **16**, 1967.
- [29] F. Liang, J. Jiang, X. Yang, G. Zhang, J. Zhou, J. Han, Y. Geng, Z. Wang, *Chem. Commun.*, 2023, **59**, 1357.
- [30] L. Yan, H. Yang, J. Li, C. Zhou, L. Li, X. Wu, C. Lei, *Anal. Chim. Acta*, 2022, **1206**, 339750.
- [31] K.H. Kim, S.J. Kim, S. Singha, Y.J. Yang, S.K. Park, K.H. Ahn, *ACS Sens.*, 2021, **6**, 3253.
